# Supplementary material for: The downstream atpE cistron is efficiently translated via its own cis-element in partially overlapping atpB–atpE dicistronic mRNAs in chloroplasts
Source: PubMed Central journal article supplement — Nucleic Acids Res. 2011 Aug 16;39(21):9405–12. doi: 10.1093/nar/gkr644 (PMC3241655; doi:10.1093/nar/gkr644), 2011-08-16
Supplement: supp_gkr644_Supplementary_Data.pdf [file supp_gkr644_Supplementary_Data.pdf]

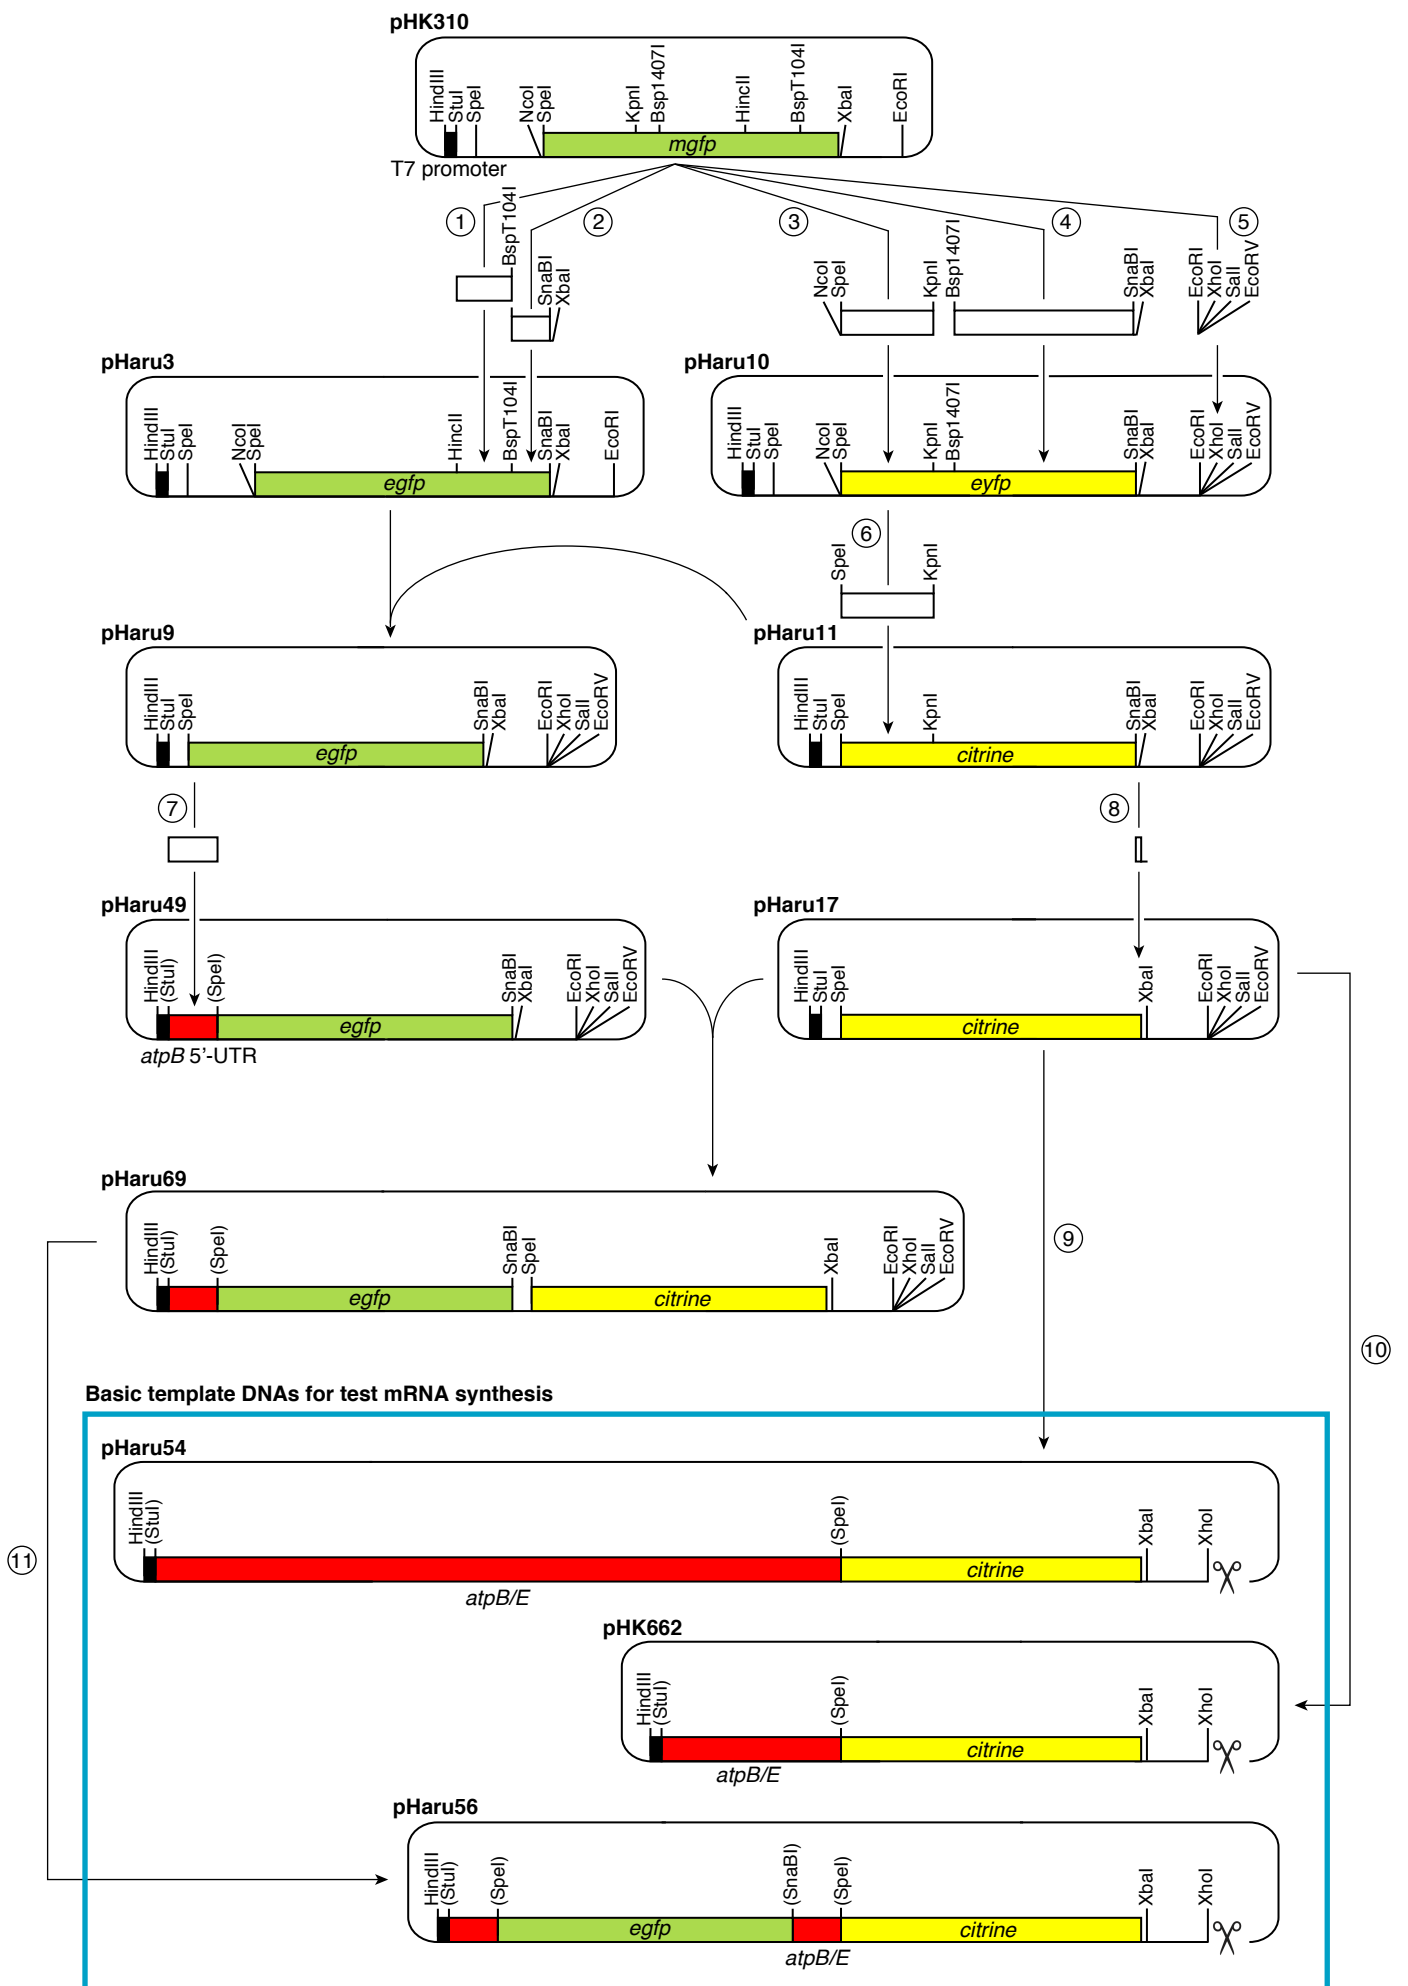

**Supplementary Figure S1.** A flow chart of plasmid construction. Filled box, T7 promoter; green box, *egfp*; yellow box, *citrine*; red box, *atpB/E* portions; white box, PCR products and annealed oligonucleotides. Oligonucleotides used in the numbered steps are listed in Supplementary Figure S9.

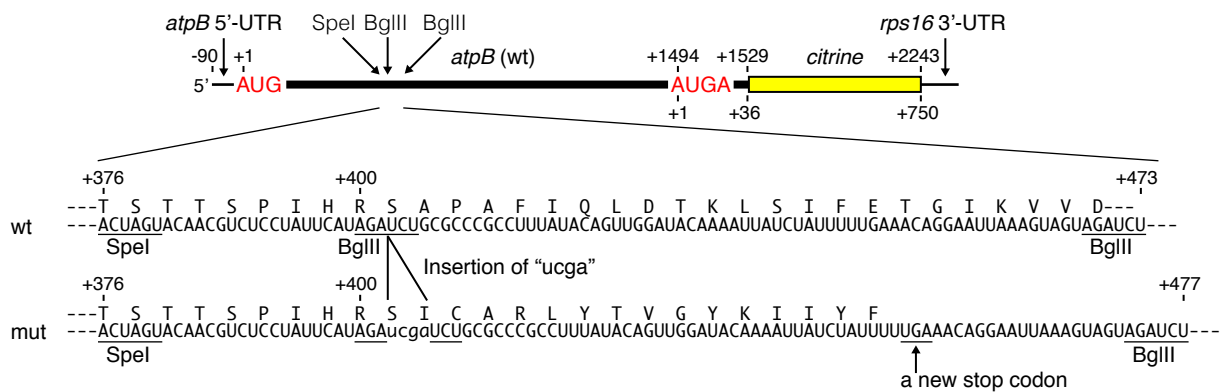

**Supplementary Figure S2.** A frameshift mutation in the *atpB* cistron. Sequences between *Spel*/*BglIII* sites. There are two *BglIII* sites, and "ucga" was inserted into the upstream *BglIII* site. Deduced amino acid sequences are shown above RNA sequences. A new stop codon in the mutant (mut) is also indicated.



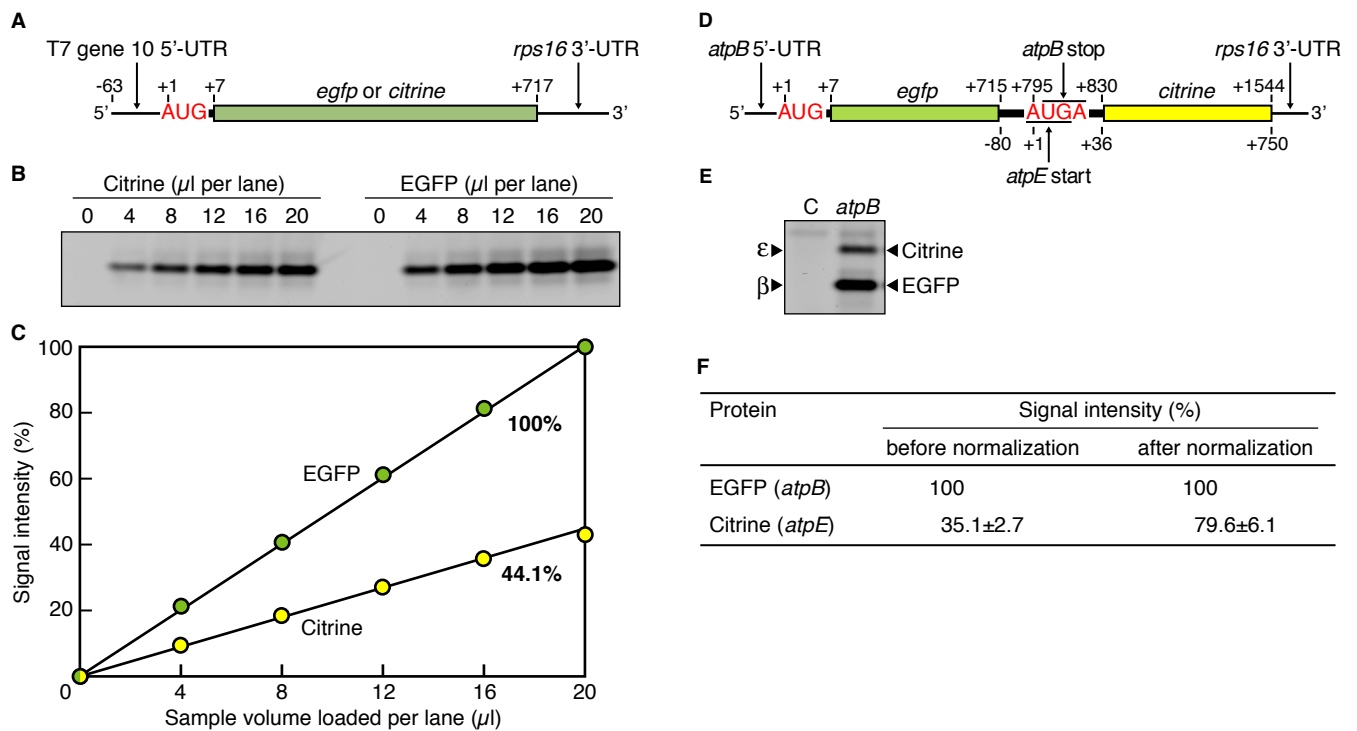

**Supplementary Figure S4.** Comparison of fluorescence intensities of EGFP and Citrine. **(A)** Schematic of test mRNAs. **(B)** Gel patterns of EGFP and Citrine products (both 239 aa) translated from the same T7 gene 10 5'-UTR for 1 h at 28 °C. Fluorescent signals were detected by irradiation of a 488-nm actinic light with a 520BP40 filter. Indicated volumes ( $\mu\text{l}$ ) of reaction mixtures were loaded. **(C)** Quantified fluorescent signals (calibration curves). Fluorescence of the Citrine was about 44.1% of that of the EGFP by 488-nm excitation. **(D)** Test mRNA in Figure 3. **(E)** Gel patterns of synthesized EGFP (from *atpB*) and Citrine (from *atpE*) products shown in Figure 3. Lane C, no mRNA added as control. **(F)** Quantification of fluorescence intensities of EGFP and Citrine by 488-nm excitation. The raw value was normalized based on the calibration curves (C).



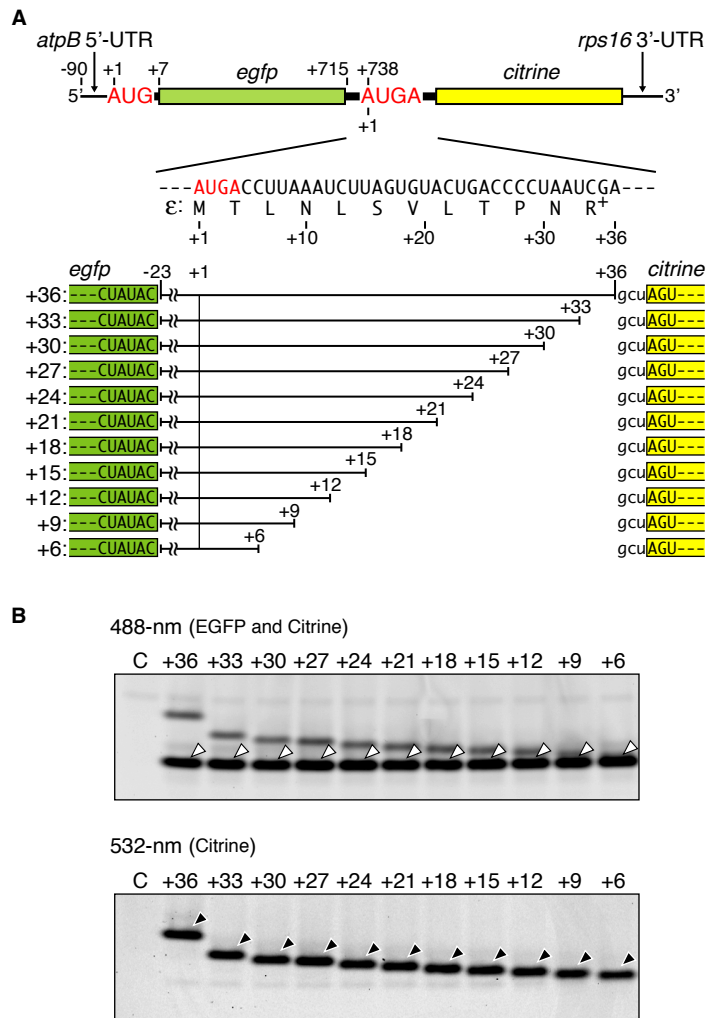

**Supplementary Figure S6.** Effect of internal deletions in the 5'-*atpE* coding region on translation of the *atpE* cistron. **(A)** The mRNA as shown in Figure 3A and a sequence of the 5'-*atpE* coding region (12 codons). mRNAs with internal deletions (indicated as blanks, from +7 to +36) are shown below. Terminal sequences of *egfp* and *citrine* are boxed. **(B)** Gel patterns of synthesized EGFP and Citrine products. White arrowheads in the upper panel and black arrowheads in the lower panel point EGFP and Citrine bands, respectively.

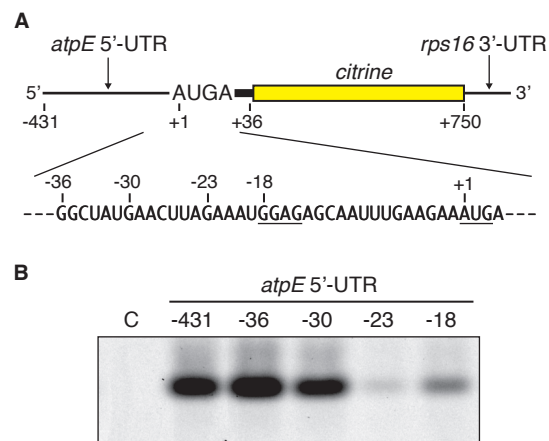

**Supplementary Figure S7.** Effect of 5' deletions of the monocistronic *atpE* mRNA on *atpE* translation. **(A)** The mRNA as in Figure 2A and a partial *atpE* 5'-UTR sequence. The SD-like sequence and the start codon are underlined. **(B)** Gel pattern of synthesized Citrine products. Translation products were detected by irradiation with 532-nm light.

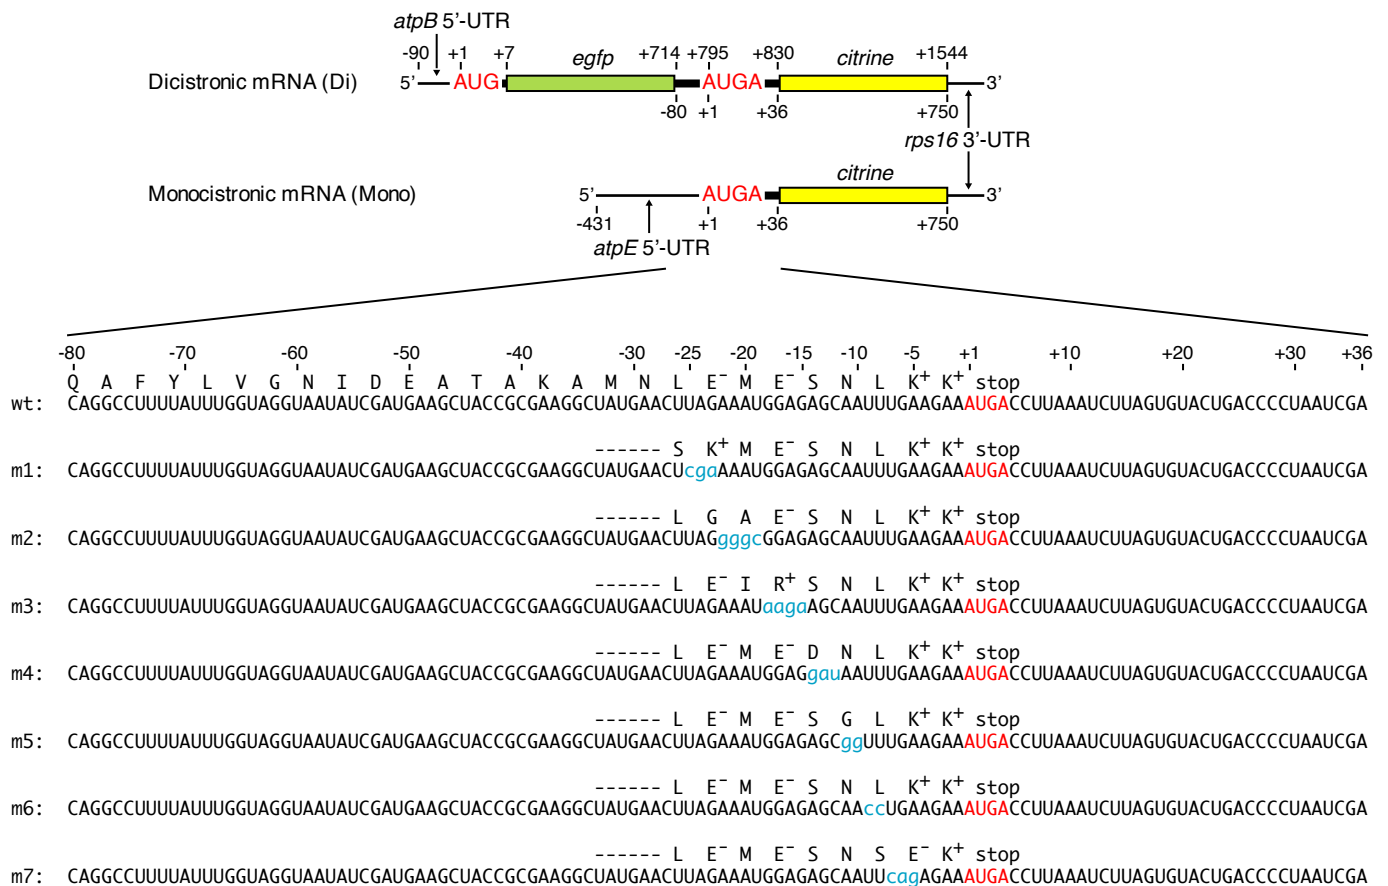

**Supplementary Figure S8.** Test mRNAs in Figure 7. Sequences surrounding the *atpE* start codon. Blue lower cases indicate mutagenized nucleotides. Deduced amino acid sequences from wild type (wt) and mutant (m1 to m7) 3'-*atpB* cistrons are shown above the nucleotide sequences.



**Supplementary Figure S9.** Lists of oligonucleotides used in this study.

**Supplementary Figure S1:**

Step #1: On-1 and On-2  
Step #2: On-3 and On-4  
Step #3: On-5 and On-6  
Step #4: On-7, On-8 and On-9  
Step #5: On-10 and On-11  
Step #6: On-5 and On-12  
Step #7: On-13 and On-14  
Step #8: On-15 and On-16  
Step #9: On-13 and On-17  
Step #10: On-17 and On-18  
Step #11: On-17 and On-19

**Figure 3:**

*atpH* 5'-UTR/AUG: On-20 and On-21  
*rbcL* 5'-UTR/AUG: On-22 and On-23  
No 5'-UTR/AUG: On-24 and On-25

**Figure 4:**

Point mutation at "-69" to created a new stop codon: On-26 and On-27

**Figure 5:**

Mutation at the BglII site in the *atpB* cistron to create a new stop codon: On-28 and On-29

**Figure 6:**

"-29": On-17 and On-30  
"-26": On-17 and On-31  
"-23": On-17 and On-32  
"-20": On-17 and On-33  
"-17": On-17 and On-34  
"-14": On-17 and On-35  
"-11": On-17 and On-36  
"-8": On-17 and On-37  
"-5": On-17 and On-38  
"-2": On-17 and On-39

**Figure 7:**

"m1": On-17, On-40 and On-41  
"m2": On-17, On-41 and On-42  
"m3": On-17, On-41 and On-43  
"m4": On-17, On-41 and On-44  
"m5": On-17, On-41 and On-45  
"m6": On-17, On-41 and On-46  
"m7": On-17, On-41 and On-47

**Supplementary Figure S6:**

"+36": On-17 and On-32  
"+33": On-32 and On-48  
"+30": On-32 and On-49  
"+27": On-32 and On-50

"+24": On-32 and On-51  
"+21": On-32 and On-52  
"+18": On-53 and On-54  
"+15": On-55 and On-56  
"+12": On-57 and On-58  
"+9": On-59 and On-60  
"+6": On-61 and On-62

On-1: 5'-AACTTCAAATTAGACACAACATTGAAGATGGAAGCGTTCAACTAGC  
On-2: 5'-  
TCTTTCGAAAGGGCAGATTGTGTGGACAGGTAATGGTTGTCTGGTAAAAGGACAGGGCC  
On-3: 5'-CCTTTCGAAAGATCCCAACGAAAAG  
On-4: 5'-CCCTCTAGATTATACGTATAGTTCATCCATGCCAAGTGTAAATCCCAG  
On-5: 5'-GGGCCATGGCTACTAGTAAAGGAGAAGAAGTCTTCTCACTGGAG  
On-6: 5'-GGGGTACCTAGCAAAGCATTGTAAACCATATCCAAAAG  
On-7: 5'-CAGATCATATGAAACAACATGACTTTTTCA  
On-8: 5'-TCTTTCGAAAGGGCAGATTGATAGGACAGGTAATGGTTGTCTG  
On-9: 5'-GAGCGGATAACAATTTACACACAGG  
On-10: 5'-AATTCTCGAGTCGACGATATC  
On-11: 5'-AATTGATATCGTTCGACTCGAG  
On-12: 5'-CTGGGTACCTAGCAAAGCACATTAACCATATCCAAAAG  
On-13: 5'-GGGCTAGCCATAATAATAAAATAAATAAAT  
On-14: 5'-CCATAATAATAAAATAAATAAATATGTCGAAATG  
On-15: 5'-AAATAACTACAGATAAAAAGATCTTAAT  
On-16: 5'-CTAGATTAAGATCTTTTTATCTGTAGTTATTT  
On-17: 5'-GGGCTAGCTCGATTAGGGGTCAGTACACTA  
On-18: 5'-GATTGGCTGCCAAAGGTATTTATCC  
On-19: 5'-CAGGCCTTTTATTTGGTAGGTAATATCG  
On-20: 5'-GATTGTATCATTAACCATTTCTTTTTTTTG  
On-21: 5'-GGGCTAGCCATGATAAGTTCCTCGTACCAA  
On-22: 5'-GTGTCGAGTAGACCTTGTTGTTG  
On-23: 5'-GGGCTAGCCATAAATCCCTCCCTACAACCTC  
On-24: 5'-AGCTTGCTGTAATACGACTCACTATAGGG  
On-25: 5'-CTAGCCCTATAGTGAGTCGTATTACAGCA  
On-26: 5'-CCTTTTAATTGGTAGGTAATAT  
On-27: 5'-CGATATTACCTACCAATTAAGG  
On-28: 5'-ATACTAGTACAACGTCTCCTATTCATAGATCGATCTGCGCCCGCCTTTAT  
On-29: 5'-CATTTCTTCCCGAGTACGTTACCC  
On-30: 5'-AACTTAGAAATGGAGAGCAATTTGAAG  
On-31: 5'-TTAGAAATGGAGAGCAATTTGAAGAAATGA  
On-32: 5'-GAAATGGAGAGCAATTTGAAGAAATGACCT  
On-33: 5'-ATGGAGAGCAATTTGAAGAAATGACCTTAA  
On-34: 5'-GAGAGCAATTTGAAGAAATGACCTTAAATC  
On-35: 5'-AGCAATTTGAAGAAATGACCTTAAATCTTA  
On-36: 5'-AATTTGAAGAAATGACCTTAAATCTTAGTG  
On-37: 5'-TTGAAGAAATGACCTTAAATCTTAGTG  
On-38: 5'-AAGAAATGACCTTAAATCTTAGTGACTG  
On-39: 5'-AAATGACCTTAAATCTTAGTGACTG  
On-40: 5'-AGGCTATGAACTCGAAAATGGAGAGCAATT  
On-41: 5'-CGCCAGGGTTTTCCAGTCACGAC  
On-42: 5'-GCTATGAACTTAGGGGCGGAGAGCAATTTG

On-43: 5'-GGCTATGAACTTAGAAATAAGAAGCAATTTGAAGAAATGACC  
On-44: 5'-CTATGAACTTAGAAATGGAGGATAATTTGAAGAAATGACCTTAAATC  
On-45: 5'-AGAAATGGAGAGCGGTTTGAAGAAATGACC  
On-46: 5'-GAAATGGAGAGCAACCTGAAGAAATGACCT  
On-47: 5'-CTTAGAAATGGAGAGCAATTCAGAGAAATGACCTTAAATCTTAGTG  
On-48: 5'-GGGCTAGCATTAGGGGTTCAGTACACTAAGATTT  
On-49: 5'-GGGTCTAGAGCTAGCAGGGGTTCAGTACACTAAGATTTAAG  
On-50: 5'-GGGCTAGCGGTTCAGTACACTAAGATTTAAGGTC  
On-51: 5'-GGGCTAGCCAGTACACTAAGATTTAAGGTCATTTTC  
On-52: 5'-GGGCTAGCTACACTAAGATTTAAGGTCATTTCTTC  
On-53: 5'-GAAATGGAGAGCAATTTGAAGAAATGACCTTAAATCTTAGTG  
On-54: 5'-CTAGCACTAAGATTTAAGGTCATTTCTTCAAATTGCTCTCCATTTTC  
On-55: 5'-GAAATGGAGAGCAATTTGAAGAAATGACCTTAAATCTTG  
On-56: 5'-CTAGCAAGATTTAAGGTCATTTCTTCAAATTGCTCTCCATTTTC  
On-57: 5'-GAAATGGAGAGCAATTTGAAGAAATGACCTTAAATG  
On-58: 5'-CTAGCATTTAAGGTCATTTCTTCAAATTGCTCTCCATTTTC  
On-59: 5'-GAAATGGAGAGCAATTTGAAGAAATGACCTTAG  
On-60: 5'-CTAGCTAAGGTCATTTCTTCAAATTGCTCTCCATTTTC  
On-61: 5'-GAAATGGAGAGCAATTTGAAGAAATGACCG  
On-62: 5'-CTAGCGGTTCATTTCTTCAAATTGCTCTCCATTTTC
